# Supplementary material for: Using Machine Learning Algorithms to Predict Immunotherapy Response in Patients with Advanced Melanoma
Source: Oxford University Press journal article supplement (doi:10.1158/1078-0432.ccr-20-2415), 2020-11-18
Supplement: 10780432ccr202415-sup-245740_2_supp_6573209_qg73j7.xlsx [file 10780432ccr202415-sup-245740_2_supp_6573209_qg73j7.xlsx]

## Sheet: Sheet1
Age	Gender	ECOG	Histologic subtype	Stage	Baseline LDH	Treatment category	Best response	Time to best response	PFS	Time to PFS	OS	Time to OS	Tumor mutation burden	Prior targeted therapy	Prior chemotherapy	BRAF mutation
23.0301	M	0	Unclassified	IV	393	Anti-CTLA-4	CR	119	No POD	2359	Alive	2359	14.1752	No	No	Unclassified
23.9726	F	0	Nodular	IV	337	Anti-CTLA-4	PR	104	POD	195	Alive	1664	NA	No	No	Unclassified
26.9562	F	0	Acral Lentiginous	IV	Unknown	Anti-CTLA-4	POD	91	POD	91	Deceased	276	6.69048	No	No	Unclassified
27.737	M	1	Unclassified	IV	1267	Anti-CTLA-4	POD	98	POD	98	Deceased	298	22.9647	No	No	No
29.6219	M	0	Unclassified	IV	Unknown	Anti-CTLA-4	POD	411	POD	411	Deceased	615	12.9752	No	No	Yes
33.1233	M	0	Unclassified	IV	673	Anti-CTLA-4	PR	118	No POD	1881	Alive	1881	21.141	No	No	Unclassified
33.3452	F	1	Unclassified	IV	3058	Anti-CTLA-4 and Anti-PD-1	POD	6	POD	6	Deceased	773	13.4027	No	No	Yes
33.52	F	1	Superficial spreading	IV	400	Anti-PD-1	POD	10	POD	10	Deceased	52	20.5451	Yes	No	Yes
35.5342	M	0	Nodular	IV	Unknown	Anti-CTLA-4	POD	18	POD	18	Deceased	218	NA	No	No	Yes
36	F	0	Superficial Spreading	IV	Unknown	Anti-CTLA-4	PR	926	No POD	3683	Alive	3683	NA	No	Yes	Unclassified
38.3178	F	0	Superficial Spreading	IIIB	388	Anti-CTLA-4 and Anti-PD-1	CR	455	No POD	1076	Alive	1076	12.522	No	No	Unclassified
38.81	F	1	Nodular	IV	295	Anti-PD-1	PR	81	No POD	1709	Alive	1709	36.3013	Yes	No	No
38.874	M	0	Nodular	IV	Unknown	Anti-CTLA-4	POD	105	POD	105	Deceased	386	NA	No	Yes	No
39	M	1	Superficial spreading	IV	364	Anti-CTLA-4 and Anti-PD-1	PR	50	No POD	1197	Alive	1197	NA	No	No	No
39.1205	M	1	Nodular	IV	Unknown	Anti-CTLA-4	POD	39	POD	39	Deceased	39	NA	Yes	Yes	Yes
39.3589	M	0	Nodular	IIIC	240	Anti-CTLA-4 and Anti-PD-1	CR	156	No POD	860	Alive	860	14.3886	No	No	No
39.9041	F	0	Nodular	IV	642	Anti-CTLA-4 and Anti-PD-1	POD	114	No POD	869	Alive	869	NA	No	No	Yes
40	M	0	Unclassified	IV	1203	Anti-CTLA-4 and Anti-PD-1	POD	25	POD	25	Deceased	46	22.2622	Yes	No	Yes
40.7397	F	0	Unclassified	IV	676	Anti-CTLA-4	POD	87	POD	87	Deceased	121	NA	No	No	Yes
41.6356	F	2	Nodular	IV	2841	Anti-PD-1	POD	5	POD	5	Deceased	22	22.2116	No	No	Unclassified
41.9863	M	0	Unclassified	IV	Unknown	Anti-CTLA-4	POD	103	POD	103	Alive	2044	17.6599	No	No	Unclassified
42	F	0	Superficial Spreading	IV	Unknown	Anti-CTLA-4	POD	101	POD	101	Deceased	113	8.23756	No	Yes	Unclassified
42.2438	M	0	Superficial Spreading	IV	500	Anti-CTLA-4	POD	105	POD	105	Deceased	1684	NA	No	No	No
42.4904	M	0	Nodular	IV	462	Anti-CTLA-4 and Anti-PD-1	CR	83	No POD	1596	Alive	1596	NA	No	No	Yes
42.5863	M	0	Unclassified	IV	Unknown	Anti-PD-1	POD	123	POD	123	Deceased	283	29.6772	No	Yes	No
42.874	F	0	Unclassified	IV	729	Anti-CTLA-4 and Anti-PD-1	PR	146	POD	371	Alive	798	15.2106	Yes	No	Yes
43.3	F	0	Unclassified	IV	Unknown	Anti-CTLA-4	CR	812	No POD	4012	Alive	4012	8.65104	No	Yes	Unclassified
44.7534	M	0	Acral Lentiginous	IV	Unknown	Anti-CTLA-4	POD	103	POD	103	Deceased	399	NA	No	No	No
45.4603	F	0	Acral Lentiginous	IV	Unknown	Anti-CTLA-4	POD	99	POD	99	Deceased	379	NA	No	Yes	No
45.5425	F	1	Nodular	IV	Unknown	Anti-CTLA-4	POD	26	POD	26	Deceased	41	8.97388	No	Yes	Yes
46.5671	M	2	Nodular	IV	922	Anti-CTLA-4	POD	107	POD	107	Deceased	107	NA	Yes	No	Yes
46.7068	M	0	Unclassified	IIIC	473	Anti-CTLA-4	CR	462	No POD	1679	Alive	1679	18.7503	No	No	Unclassified
46.9315	F	0	Unclassified	IV	Unknown	Anti-CTLA-4	CR	208	No POD	2898	Alive	2898	32.5261	No	No	Yes
47	M	0	Superficial spreading	IV	199	Anti-CTLA-4	POD	25	POD	25	Deceased	366	29.5952	No	No	No
48.7123	M	1	Superficial Spreading	IV	High	Anti-CTLA-4	POD	141	POD	141	Deceased	141	NA	No	No	No
48.8	M	Unknown	Superficial Spreading	IV	High	Anti-CTLA-4	POD	73	POD	73	Deceased	73	NA	No	No	Unclassified
49	M	0	Superficial Spreading	IV	Normal	Anti-CTLA-4	POD	113	POD	113	Alive	2472	24.1374	No	No	Unclassified
49.0548	F	0	Desmoplastic	IIIC	418	Anti-CTLA-4	POD	127	POD	127	Alive	921	NA	No	No	None
49.1041	M	2	Nodular	IV	Unknown	Anti-CTLA-4	POD	57	POD	57	Deceased	195	NA	No	Yes	Unclassified
49.1562	F	0	Nodular	IV	348	Anti-CTLA-4 and Anti-PD-1	POD	105	POD	105	Deceased	461	5.96562	No	No	Unclassified
50	F	0	Unclassified	IV	131	Anti-CTLA-4 and Anti-PD-1	PR	70	No POD	1341	Alive	1341	13.7214	No	No	Yes
51.4082	M	0	Unclassified	IV	578	Anti-CTLA-4	POD	56	POD	56	Deceased	61	25.7016	No	No	No
51.5644	M	0	Unclassified	IV	Unknown	Anti-CTLA-4	CR	895	No POD	3129	Alive	3129	NA	No	No	Unclassified
51.8055	M	0	Nodular	IV	Unknown	Anti-CTLA-4	POD	76	POD	76	Deceased	405	80.1983	No	Yes	No
51.9616	M	2	Nodular	IV	1255	Anti-CTLA-4	POD	67	POD	66	Deceased	66	134.764	No	No	Unclassified
52	M	0	Nodular	IV	Unknown	Anti-CTLA-4	PR	1189	POD	1302	Deceased	1486	17.6725	No	Yes	Yes
52	F	3	Superficial spreading	IV	494	Anti-CTLA-4 and Anti-PD-1	POD	236	POD	236	Alive	335	NA	Yes	No	Yes
52.0247	M	0	Superficial Spreading	IV	Unknown	Anti-CTLA-4	POD	40	POD	40	Deceased	101	NA	No	Yes	Yes
53	M	0	Unclassified	IV	178	Anti-PD-1	PR	259	No POD	1003	Alive	1013	NA	Yes	No	Yes
53.6521	M	2	Nodular	IV	Unknown	Anti-CTLA-4	POD	22	POD	22	Deceased	45	21.4414	No	Yes	Yes
54	M	1	Acral	IV	131	Anti-PD-1	POD	58	POD	58	Deceased	777	NA	No	Yes	No
54.1452	M	0	Nodular	IV	Unknown	Anti-CTLA-4	POD	77	POD	77	Deceased	336	NA	No	No	Unclassified
54.4247	M	0	Unclassified	IV	725	Anti-CTLA-4 and Anti-PD-1	PR	35	No POD	1148	Alive	1148	NA	No	No	No
55.0685	F	Unknown	Nodular	IV	Unknown	Anti-CTLA-4	POD	291	POD	291	Deceased	389	13.8266	No	No	Unclassified
55.3589	M	0	Nodular	IV	Unknown	Anti-CTLA-4	POD	608	POD	608	Deceased	659	NA	No	Yes	Yes
55.7671	F	1	Unclassified	IV	581	Anti-CTLA-4	POD	119	POD	119	Deceased	119	NA	Yes	No	Unclassified
56	M	0	Nodular	IV	120	Anti-CTLA-4	POD	82	POD	82	Alive	2977	26.6	No	Yes	Yes
56	M	0	Nodular	IV	212	Anti-PD-1	PR	104	POD	317	Deceased	955	NA	No	No	Yes
56.189	F	1	Unclassified	IV	500	Anti-CTLA-4	POD	36	POD	36	Deceased	57	11.4729	Yes	No	Yes
56.3342	M	1	Superficial Spreading	IIIC	415	Anti-PD-1	PR	259	No POD	1134	Alive	1134	NA	No	No	Unclassified
56.4438	F	0	Unclassified	IV	Unknown	Anti-CTLA-4	POD	77	POD	77	Deceased	113	NA	No	Yes	Yes
56.8	M	0	Acral Lentiginous	IV	123	Anti-PD-1	POD	140	POD	140	Deceased	453	12.2211	No	No	No
57.5699	F	1	Nodular	IIIC	394	Anti-CTLA-4	POD	56	POD	56	Alive	170	17.5779	No	No	Unclassified
57.8055	F	0	Nodular	IV	493	Anti-PD-1	POD	84	No POD	719	Alive	719	18.6608	No	No	Yes
58	F	1	Uveal	IV	607	Anti-CTLA-4	POD	42	POD	42	Deceased	78	8.84977	No	No	No
58	F	0	Superficial spreading	IV	191	Anti-PD-1	POD	69	POD	69	Alive	950	NA	No	No	Yes
58	M	0	Unclassified	IV	200	Anti-PD-1	POD	84	POD	84	Deceased	536	NA	No	No	Yes
58.1	F	0	Nodular	IIIC	Unknown	Anti-CTLA-4	CR	254	No POD	4460	Alive	4460	25.2044	No	Yes	No
58.6055	M	1	Unclassified	IV	1487	Anti-CTLA-4 and Anti-PD-1	POD	73	POD	196	Deceased	269	NA	Yes	Yes	Unclassified
58.9918	M	0	Nodular	IV	643	Anti-CTLA-4 and Anti-PD-1	CR	78	POD	289	Deceased	549	18.5126	No	No	No
59.3671	M	0	Unclassified	IV	1044	Anti-PD-1	POD	57	POD	57	Alive	244	34.9154	No	No	No
59.6	M	0	Nodular	IIIC	463	Anti-CTLA-4 and Anti-PD-1	POD	73	POD	73	Deceased	153	11.4599	No	No	No
60.2329	M	1	Nodular	IV	730	Anti-CTLA-4	POD	36	POD	36	Deceased	36	NA	Yes	No	Unclassified
61	F	1	Superficial spreading	IV	163	Anti-PD-1	POD	58	POD	58	Alive	836	NA	No	No	Yes
61	M	1	Unclassified	IV	188	Anti-CTLA-4 and Anti-PD-1	PR	102	No POD	1309	Alive	1309	110.344	No	No	No
61.2	M	0	Unclassified	IIIC	329	Anti-CTLA-4 and Anti-PD-1	CR	173	No POD	775	Alive	775	15.8627	No	No	Yes
61.4	F	0	Nodular	IV	Unknown	Anti-CTLA-4	POD	148	POD	138	Deceased	372	19.5913	Yes	No	Yes
61.8548	M	0	Acral Lentiginous	IV	Unknown	Anti-CTLA-4	POD	127	POD	127	Deceased	127	NA	No	No	No
62	M	0	Unclassified	IV	179	Anti-PD-1	PR	84	POD	1310	Deceased	1694	81.0657	Yes	No	No
62.0137	M	0	Unclassified	IV	444	Anti-CTLA-4 and Anti-PD-1	PR	357	POD	1295	Alive	1295	12.6468	No	No	Unclassified
62.2904	M	1	Mucosal	IV	1508	Anti-CTLA-4	POD	81	POD	81	Deceased	91	16.2785	No	No	Unclassified
62.7	F	0	Superficial Spreading	IV	Unknown	Anti-CTLA-4	POD	110	POD	110	Deceased	690	NA	No	Yes	No
62.7041	M	0	Unclassified	IV	360	Anti-PD-1	POD	119	POD	119	Alive	453	14.8764	No	No	Unclassified
62.96	M	1	Unclassified	IV	285	Anti-PD-1	PR	125	No POD	2001	Alive	2001	57.1746	No	No	No
63	M	1	Nodular	IV	346	Anti-CTLA-4 and Anti-PD-1	PR	61	No POD	903	Alive	903	NA	No	No	Yes
63.9589	F	0	Desmoplastic	IIIC	346	Anti-CTLA-4	PR	167	POD	1504	Alive	1805	10.0564	No	No	Unclassified
64	F	2	Superficial spreading	IV	164	Anti-PD-1	POD	38	POD	38	Deceased	41	NA	No	No	No
64.1	M	0	Nodular	IV	Unknown	Anti-CTLA-4	POD	113	POD	113	Deceased	113	NA	No	Yes	Unclassified
64.5479	F	0	Unclassified	IIIC	366	Anti-CTLA-4	POD	126	POD	126	Alive	1989	39.2824	No	No	No
64.7068	F	1	Superficial Spreading	IV	Unknown	Anti-CTLA-4	POD	48	POD	48	Deceased	48	16.8558	No	Yes	No
65.2082	M	0	Unclassified	IV	Unknown	Anti-CTLA-4	POD	42	POD	42	Deceased	182	23.9146	Yes	Yes	Unclassified
65.3014	M	1	Unclassified	IV	440	Anti-PD-1	POD	727	POD	727	Deceased	869	NA	No	No	Unclassified
66.06	M	1	Superficial spreading	IV	202	Anti-PD-1	CR	82	No POD	1703	Alive	1703	57.8809	Yes	No	No
66.1726	M	0	Nodular	IIIB	307	Anti-CTLA-4	POD	112	POD	112	Deceased	483	NA	No	No	No
66.3096	M	0	Nodular	IIIC	540	Anti-PD-1	CR	421	No POD	450	Alive	450	13.374	No	No	No
66.3315	F	0	Unclassified	IV	637	Anti-CTLA-4	POD	91	POD	91	Deceased	174	24.7111	Yes	Yes	Yes
66.5863	M	1	Nodular	IV	Unknown	Anti-CTLA-4	POD	43	POD	43	Deceased	43	22.2464	Yes	Yes	Yes
66.9041	F	0	Superficial Spreading	IV	2769	Anti-CTLA-4	POD	19	POD	19	Deceased	136	59.0339	No	No	No
67	M	0	Superficial spreading	IV	163	Anti-PD-1	POD	65	POD	65	Deceased	693	NA	No	No	Yes
67.1562	F	0	Nodular	IV	1273	Anti-CTLA-4	POD	84	POD	84	Alive	1190	NA	No	No	Unclassified
67.2027	M	Unknown	Unclassified	IIIC	Unknown	Anti-CTLA-4	CR	3052	No POD	5594	Alive	5594	NA	No	Yes	Unclassified
67.2164	F	1	Acral Lentiginous	IV	383	Anti-CTLA-4 and Anti-PD-1	CR	355	No POD	1868	Alive	1868	NA	No	No	Unclassified
67.7014	F	0	Unclassified	IV	351	Anti-CTLA-4	POD	113	POD	113	Deceased	828	16.09	Yes	No	Unclassified
68.7	M	1	Unclassified	IV	197	Anti-PD-1	POD	43	POD	43	Deceased	156	53.5429	Yes	No	No
69.2	M	0	Superficial Spreading	IV	349	Anti-PD-1	PR	987	No POD	987	Alive	987	NA	No	No	No
69.4274	M	0	Unclassified	IV	363	Anti-CTLA-4	POD	66	POD	66	Deceased	146	8.90986	No	No	Unclassified
69.4411	M	0	Superficial Spreading	IV	1035	Anti-CTLA-4	POD	108	POD	108	Deceased	108	NA	Yes	No	Unclassified
69.7671	F	0	Unclassified	IV	430	Anti-PD-1	PR	80	POD	686	Alive	1584	NA	Yes	No	Unclassified
70	M	1	Nodular	IV	385	Anti-PD-1	POD	46	POD	46	Deceased	60	35.9816	Yes	No	No
70.2192	M	0	Nodular	IIIC	404	Anti-PD-1	CR	168	No POD	280	Alive	280	13.3858	No	No	Yes
70.51	M	1	Superficial spreading	IV	343	Anti-PD-1	CR	77	POD	587	Deceased	587	18.549	Yes	No	Yes
70.6877	M	0	Desmoplastic	IV	460	Anti-PD-1	POD	85	POD	85	Alive	224	NA	No	No	No
70.7616	M	0	Nodular	IV	407	Anti-CTLA-4	POD	77	POD	77	Deceased	236	19.8504	No	No	Unclassified
71.2849	F	0	Unclassified	IIIB	420	Anti-PD-1	CR	56	No POD	264	Alive	264	NA	No	No	No
71.7014	M	Unknown	Unclassified	IV	Unknown	Anti-CTLA-4	POD	38	POD	38	Deceased	158	NA	No	Yes	No
71.8301	M	0	Unclassified	IV	Unknown	Anti-CTLA-4	POD	99	POD	99	Deceased	247	12.5781	No	No	No
71.8959	M	0	Superficial Spreading	IV	386	Anti-PD-1	POD	85	POD	85	Alive	428	NA	No	No	Yes
73.137	M	0	Nodular	IV	536	Anti-CTLA-4	POD	174	POD	660	Deceased	911	17.4753	No	No	Unclassified
73.211	F	0	Acral Lentiginous	IV	435	Anti-CTLA-4 and Anti-PD-1	PR	69	No POD	1077	Alive	1077	NA	No	No	No
73.326	F	0	Nodular	IV	382	Anti-CTLA-4	PR	106	POD	288	Deceased	1018	NA	No	No	Unclassified
73.5041	F	1	Unclassified	IV	622	Anti-CTLA-4	POD	120	POD	120	Deceased	266	17.1741	No	No	No
73.7507	M	0	Unclassified	IV	875	Anti-CTLA-4	POD	125	POD	125	Deceased	301	10.7982	Yes	No	Unclassified
73.9616	M	0	Superficial Spreading	IV	441	Anti-CTLA-4	PR	112	No POD	1719	Alive	1719	NA	No	No	No
74.1863	M	0	Unclassified	IV	392	Anti-CTLA-4 and Anti-PD-1	CR	41	No POD	1141	Alive	1141	16.6566	No	No	No
74.2712	M	0	Unclassified	IIIB	417	Anti-PD-1	CR	146	No POD	379	Alive	379	95.6478	No	No	No
74.7342	M	0	Unclassified	IV	414	Anti-CTLA-4	POD	55	POD	55	Alive	1198	37.5897	No	No	None
74.7562	M	Unknown	Nodular	IV	Unknown	Anti-CTLA-4	POD	173	POD	173	Deceased	173	24.2859	No	No	Unclassified
75	M	1	Nodular	IV	221	Anti-CTLA-4 and Anti-PD-1	CR	42	No POD	1976	Alive	1976	NA	No	No	No
75	M	1	Superficial spreading	IV	208	Anti-CTLA-4	POD	109	POD	109	Deceased	117	27.0266	No	No	No
75.4438	M	0	Desmoplastic	IV	328	Anti-PD-1	PR	469	POD	823	Alive	900	NA	No	No	No
75.8	M	0	Superficial Spreading	IV	Unknown	Anti-CTLA-4	POD	84	POD	84	Deceased	104	NA	No	No	Unclassified
75.8904	M	1	Unclassified	IV	1124	Anti-CTLA-4	POD	15	POD	15	Deceased	94	30.8789	No	No	Unclassified
77	M	1	Nodular	IV	455	Anti-CTLA-4 and Anti-PD-1	CR	84	No POD	1064	Alive	1064	46.0914	No	No	No
77.0712	M	Unknown	Unclassified	IV	820	Anti-CTLA-4 and Anti-PD-1	PR	85	No POD	1221	Alive	1221	NA	No	No	No
77.2055	M	0	Unclassified	IV	432	Anti-PD-1	CR	244	No POD	809	Alive	809	NA	No	No	No
77.2521	F	0	Unclassified	IIIB	531	Anti-PD-1	CR	266	No POD	693	Alive	693	24.0494	No	No	No
77.5945	M	0	Unclassified	IV	405	Anti-PD-1	CR	203	No POD	910	Alive	910	NA	No	No	No
78	M	0	Nodular	IV	170	Anti-CTLA-4 and Anti-PD-1	PR	66	No POD	757	Alive	757	57.3711	No	No	No
79.8822	M	1	Unclassified	IV	839	Anti-CTLA-4	POD	111	POD	111	Alive	1175	NA	No	No	Unclassified
80.6082	M	1	Mucosal	IV	347	Anti-PD-1	POD	39	POD	39	Deceased	107	NA	No	No	No
80.9644	M	0	Unclassified	IV	511	Anti-PD-1	CR	247	No POD	1301	Alive	1301	42.3728	No	No	No
81.8329	F	1	Acral Lentiginous	IV	Unknown	Anti-CTLA-4	POD	19	POD	19	Deceased	210	NA	No	Yes	Yes
82.7	M	0	Unclassified	IV	817	Anti-PD-1	POD	37	POD	21	Deceased	67	NA	No	No	Unclassified
83.6438	M	0	Unclassified	IV	484	Anti-CTLA-4 and Anti-PD-1	CR	68	No POD	957	Alive	957	NA	No	No	Unclassified
83.8192	M	0	Nodular	IIIC	346	Anti-PD-1	POD	105	POD	105	Alive	281	7.84283	No	No	Yes
85.4712	M	0	Nodular	IV	1046	Anti-CTLA-4	PR	106	POD	196	Deceased	509	24.976	No	No	Unclassified
87.2	M	0	Unclassified	IV	393	Anti-PD-1	POD	108	POD	108	Deceased	185	9.71952	No	Yes	No
88	F	0	Mucosal	IV	Unknown	Anti-CTLA-4	PR	86	POD	164	Deceased	164	8.72883	No	No	Unclassified
88.8959	M	1	Unclassified	IV	499	Anti-PD-1	CR	182	POD	507	Deceased	569	NA	No	No	No
89	F	1	Mucosal	IV	438	Anti-CTLA-4 and Anti-PD-1	CR	90	No POD	1446	Alive	1446	10.4712	No	No	No
90.2877	M	1	Nodular	IV	522	Anti-CTLA-4	PR	105	POD	525	Alive	1371	60.5162	No	Yes	Unclassified
